# Supplementary material for: Enhanced performance of a dye-sensitized solar cell with an amphiphilic polymer-gelled ionic liquid electrolyte
Source: Royal Society of Chemistry journal article supplement (doi:10.1039/c2ta00784c), 2012-12-14
Supplement: c2ta00784c.pdf [file c2ta00784c.pdf]

**Supporting Information for**

**Enhanced Performance of Dye–Sensitized Solar Cell with an**

**Amphiphilic Polymer–Gelled Ionic Liquid Electrolyte**

**Ling-Yu Chang<sup>a</sup>, Chuan-Pei Lee<sup>b</sup>, R. Vittal<sup>b</sup>, Jiang-Jen Lin<sup>a\*</sup>, and**

**Kuo-Chuan Ho<sup>a,b\*</sup>**

<sup>a</sup>Institute of Polymer Science and Engineering,

National Taiwan University, Taipei 10617, Taiwan

<sup>b</sup>Department of Chemical Engineering,

National Taiwan University, Taipei 10617, Taiwan

Corresponding authors:

<sup>a\*</sup> E-mail: [jianglin@ntu.edu.tw](mailto:jianglin@ntu.edu.tw); Tel: +886–2–3366–5312; Fax: +886–2–3366–5237

<sup>b\*</sup> E-mail: [kcho@ntu.edu.tw](mailto:kcho@ntu.edu.tw); Tel: +886–2–2366–0739; Fax: +886–2–2362–3040

# Electronic Supporting Information

## Experimental

### Synthesis of poly(oxyethylene)–segmented amide–imide (POEM)

The POEM polymer was synthesized through the reaction between POE2000 and ODPA at a molar ratio of 6:5, by the procedure described below. POE2000 (10.00 g, 0.005 mol) in THF (15 ml) was poured into a 100 ml three-necked, round-bottomed flask, equipped with a magnetic stirrer, nitrogen inlet–outlet lines, and a thermometer. A solution of ODPA anhydride (1.29 g, 0.004 mol) in THF (10 ml) was added to the reactor through a funnel in a drop-wise manner. During the addition, the mixture was stirred vigorously and the reactor was maintained at 150 °C for 3 h. The product mixture was subjected to rotary evaporation under a reduced pressure and was recovered as a yellowish waxy solid. The synthesis of POEM is represented in Scheme S1.

**Scheme:**

**Scheme S1** Synthesis of poly(oxyethylene)-segmented amide-imide (POEM) by two-step process of forming POE-amidoacids and POEM at elevated temperature.

**Figure Captions:**

**Figure S1** The cell efficiencies of QSS-DSSCs with various weight percentage of POEM added in RTIL electrolyte.

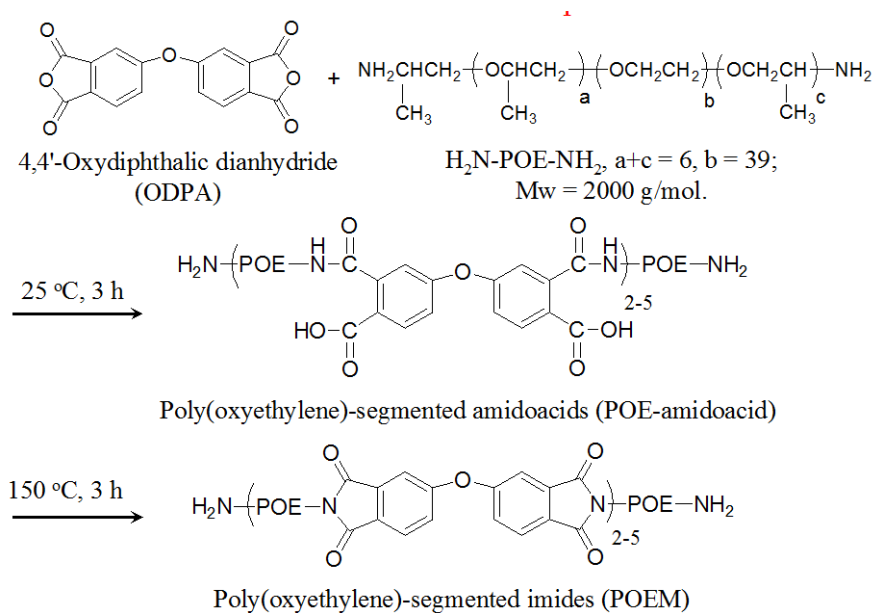

**Scheme S1**

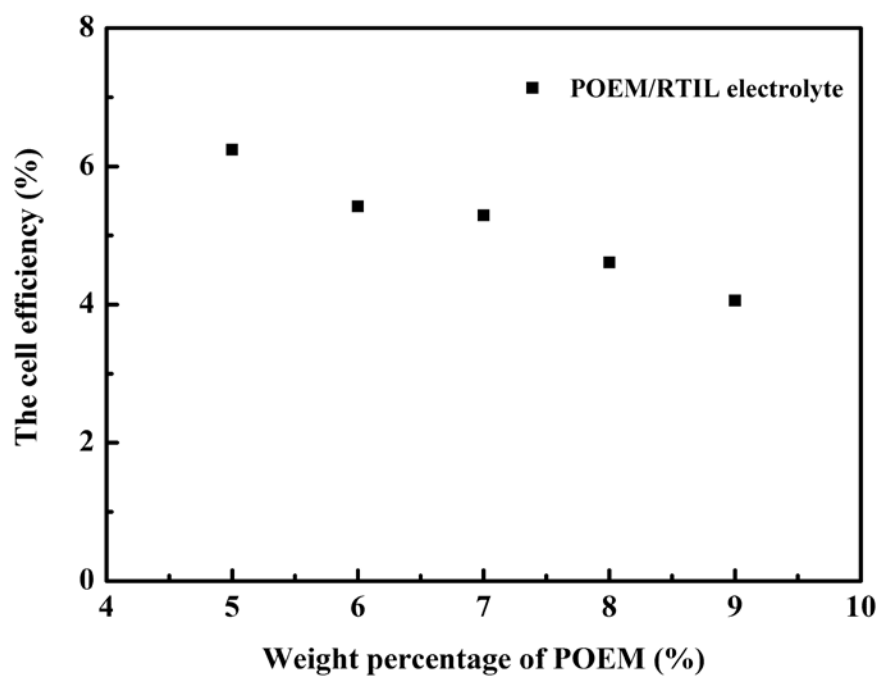

Figure S1
